# Supplementary material for: C. elegans sperm bud vesicles to deliver a meiotic maturation signal to distant oocytes
Source: Oxford University Press journal article supplement (doi:10.1242/dev.01916), 2005-06-23
Supplement: dev01916t1.pdf [file dev01916t1.pdf]

**Table S1. Time-course analysis of MSP signaling**

| Genotype*                | Meiotic maturation rates (maturation per gonad arm per hour) |                                      |                                      |                                        |                                      |
|--------------------------|--------------------------------------------------------------|--------------------------------------|--------------------------------------|----------------------------------------|--------------------------------------|
|                          | 1-day adult                                                  | 2-day adult                          | 3-day adult                          | 4-day adult                            | 5-day adult                          |
| <i>fog-2(q71)</i>        | 0.07±0.07<br>(n=18)                                          | 0.17±0.13<br>(n=18)                  | 0.22±0.20<br>(n=18)                  | 0.20±0.20<br>(n=18)                    | 0.21±0.16<br>(n=19)                  |
| Wild type                | 2.23±0.67 <sup>†</sup><br>(n=30)                             | 2.87±0.57 <sup>†</sup><br>(n=30)     | 1.38±0.83 <sup>†</sup><br>(n=30)     | 0.82±0.54 <sup>†</sup><br>(n=28)       | 0.30±0.30 <sup>‡</sup><br>(n=26)     |
| Wild type mated on day 3 | N. A.                                                        | N. A.                                | N. A.                                | 2.32±0.82 <sup>†,§</sup><br>(n=37)     | 1.68±0.73 <sup>†,§</sup><br>(n=42)   |
| <i>fog-2(q71)</i> mated  | 1.80±0.41 <sup>†,¶</sup><br>(n=32)                           | 2.63±0.58 <sup>†,**</sup><br>(n=30)  | 2.71±0.73 <sup>†,§</sup><br>(n=30)   | 2.47±0.95 <sup>†,§</sup><br>(n=29)     | 1.51±0.87 <sup>†,§</sup><br>(n=26)   |
| <i>tra-3(e2333)</i>      | 1.77±0.38 <sup>†,¶</sup><br>(n=34)                           | 2.40±0.54 <sup>†,¶</sup><br>(n=25)   | 2.30±0.63 <sup>†,§</sup><br>(n=28)   | 1.22±0.40 <sup>†,§</sup><br>(n=24)     | 0.56±0.43 <sup>†,§,¶</sup><br>(n=19) |
| <i>spe-9(eb19)</i>       | 1.17±0.73 <sup>†,§</sup><br>(n=18)                           | 1.98±0.69 <sup>†,**</sup><br>(n=18)  | 2.17±0.50 <sup>†,§</sup><br>(n=14)   | 2.35±0.53 <sup>†,§</sup><br>(n=12)     | 1.73±0.64 <sup>†,§</sup><br>(n=16)   |
| <i>spe-8(hc50)</i>       | 1.73±0.67 <sup>†,‡,¶</sup><br>(n=20)                         | 1.35±0.82 <sup>†,§</sup><br>(n=20)   | 0.99±0.60 <sup>†,**</sup><br>(n=30)  | 0.64±0.55 <sup>†,**,††</sup><br>(n=28) | 0.94±0.66 <sup>†,§</sup><br>(n=21)   |
| <i>spe-8(hc50)</i> mated | N. D.                                                        | N. D.                                | N. D.                                | N. D.                                  | 2.27±0.90 <sup>†,§</sup><br>(n=10)   |
| <i>spe-27(it110)</i>     | 1.54±0.84 <sup>†,¶</sup><br>(n=20)                           | 1.01±0.43 <sup>†,‡,¶</sup><br>(n=20) | 1.27±0.68 <sup>†,§,§</sup><br>(n=30) | 1.05±0.58 <sup>†,**</sup><br>(n=30)    | 0.90±0.62 <sup>†,§</sup><br>(n=32)   |

Maturation rates were measured in 5-hour intervals at various times after mid-L4 stage. Standard deviations are shown. Statistical significance was assessed using Student's *t*-test.

N. A., not applicable; N. D., not done.

\*Genotypes analyzed: *fog-2(q71)* produce no sperm; *tra-3(e2333)* produce approximately 50% more sperm (Hodgkin and Barnes, 1991); *spe-9(eb19)* are defective in fertilization; *spe-8(hc50)* and *spe-27(it110)* produce non-motile spermatids lacking a pseudopod (Singson et al., 1998).

<sup>†</sup>*P*<0.001, <sup>††</sup>*P*<0.01, and <sup>‡</sup>*P*>0.5, compared with *fog-2(q71)* female values at the same time point.

<sup>§</sup>*P*<0.001, <sup>¶</sup>*P*<0.01, <sup>‡‡</sup>*P*<0.05, <sup>\*\*</sup>*P*>0.2, and <sup>§§</sup>*P*>0.5, compared with wild-type hermaphrodite values at the same time point.

Summary of meiotic maturation time-course measurements. (1) Meiotic maturation rates are fine-tuned to the number of spermatozoa present (compare *fog-2(q71)*, wild type and *tra-3(e2333)*). (2) Spermatozoa must signal continuously because rates remain high in the fertilization-defective *spe-9* mutant (*spe-9(eb19)*). (3) Spermatids produce a long-acting signal, which persists after the *spe-8* and *spe-27* spermatids are swept from the gonad arm (*spe-8(hc50)*, *spe-8(hc50)* mated and *spe-27(it110)*). Thus, a block to spermiogenesis short circuits the sperm-sensing mechanism.

## References

- Hodgkin, J. and Barnes, T. M. (1991). More is not better: brood size and population growth in a self-fertilizing nematode. *Proc. R. Soc. Lond. B Biol. Sci.* **246**, 19-24.
- Singson, A., Mercer, K. B. and L'Hernault, S. W. (1998). The *C. elegans spe-9* gene encodes a sperm transmembrane protein that contains EGF-like repeats and is required for fertilization. *Cell* **93**, 71-79.
